# Supplementary material
Source: PubMed Central journal article supplement (PMC9665872)
Supplement: NIHMS1845668-supplement-Supplemental_Material.pdf [file NIHMS1845668-supplement-Supplemental_Material.pdf]

**African Americans' Relationship Quality and Depressive Symptoms: A longitudinal investigation of the Marital Discord Model - Supplemental Material**

Supplemental Table 1. Bivariate Correlations and Descriptive Statistics of Study Variables (N=348)

| Variable  | 1     | 2     | 3     | 4     | 5     | 6     | 7     | 8     | 9     | 10    | 11    | 12    | 13    | 14    | 15    | 16    |
|-----------|-------|-------|-------|-------|-------|-------|-------|-------|-------|-------|-------|-------|-------|-------|-------|-------|
| 1. DS W1  | —     |       |       |       |       |       |       |       |       |       |       |       |       |       |       |       |
| 2. DS W2  | 0.64  | —     |       |       |       |       |       |       |       |       |       |       |       |       |       |       |
| 3. DS W3  | 0.54  | 0.66  | —     |       |       |       |       |       |       |       |       |       |       |       |       |       |
| 4. DS W4  | 0.52  | 0.59  | 0.61  | —     |       |       |       |       |       |       |       |       |       |       |       |       |
| 5. RS W1  | -0.32 | -0.23 | -0.26 | -0.18 | —     |       |       |       |       |       |       |       |       |       |       |       |
| 6. RS W2  | -0.29 | -0.31 | -0.26 | -0.27 | 0.49  | —     |       |       |       |       |       |       |       |       |       |       |
| 7. RS W3  | -0.31 | -0.31 | -0.44 | -0.37 | 0.51  | 0.60  | —     |       |       |       |       |       |       |       |       |       |
| 8. RS W4  | -0.28 | -0.25 | -0.32 | -0.42 | 0.33  | 0.45  | 0.65  | —     |       |       |       |       |       |       |       |       |
| 9. IA W1  | 0.34  | 0.28  | 0.20  | 0.23  | -0.54 | -0.37 | -0.37 | -0.19 | —     |       |       |       |       |       |       |       |
| 10. IA W2 | 0.33  | 0.40  | 0.30  | 0.25  | -0.44 | -0.54 | -0.42 | -0.29 | 0.56  | —     |       |       |       |       |       |       |
| 11. IA W3 | 0.32  | 0.28  | 0.34  | 0.34  | -0.48 | -0.48 | -0.61 | -0.47 | 0.49  | 0.54  | —     |       |       |       |       |       |
| 12. IA W4 | 0.32  | 0.35  | 0.37  | 0.45  | -0.37 | -0.48 | -0.59 | -0.67 | 0.46  | 0.54  | 0.71  | —     |       |       |       |       |
| 13. PS W1 | -0.23 | -0.19 | -0.17 | -0.09 | 0.72  | 0.50  | 0.41  | 0.25  | -0.53 | -0.43 | -0.46 | -0.36 | —     |       |       |       |
| 14. PS W2 | -0.28 | -0.26 | -0.28 | -0.23 | 0.44  | 0.75  | 0.53  | 0.40  | -0.40 | -0.57 | -0.44 | -0.44 | 0.55  | —     |       |       |
| 15. PS W3 | -0.28 | -0.27 | -0.37 | -0.35 | 0.43  | 0.52  | 0.81  | 0.58  | -0.34 | -0.43 | -0.60 | -0.59 | 0.47  | 0.60  | —     |       |
| 16. PS W4 | -0.26 | -0.23 | -0.34 | -0.41 | 0.30  | 0.42  | 0.63  | 0.80  | -0.18 | -0.31 | -0.47 | -0.65 | 0.32  | 0.46  | 0.69  | —     |
| M         | 11.28 | 12.51 | 11.92 | 11.64 | 25.14 | 24.05 | 23.72 | 23.88 | 19.03 | 19.74 | 19.69 | 19.53 | 21.23 | 20.12 | 19.46 | 19.36 |
| SD        | 7.73  | 8.05  | 9.03  | 9.20  | 4.03  | 5.11  | 5.48  | 5.54  | 5.77  | 4.42  | 4.56  | 4.72  | 3.63  | 4.62  | 5.11  | 5.21  |

*Notes.* DS = Depressive symptoms. RS = Relationship Satisfaction. IA = Ineffective Arguing. PS = Partner Support. W1 = Wave 1. W2 = Wave 2. W3 = Wave 3. W4 = Wave 4. Correlations greater than 0.16 significant at  $p < .05$ . Individuals were nested within couples to account for interdependence.

Supplemental Table 2: Model Fit Statistics

| Model                      | Model Fit Statistics |    |      |       |      | Model Comparisons |             |          |
|----------------------------|----------------------|----|------|-------|------|-------------------|-------------|----------|
|                            | $\chi^2$             | Df | CFI  | RMSEA | SRMR | TRd <sup>a</sup>  | $\Delta$ df | <i>p</i> |
| <u>RI-CLPM</u>             |                      |    |      |       |      |                   |             |          |
| RS ↔ DS                    | 42.88                | 16 | 0.98 | 0.05  | 0.04 | ---               |             |          |
| IA ↔ DS                    | 31.63                | 16 | 0.99 | 0.04  | 0.03 | ---               |             |          |
| PS ↔ DS                    | 40.40                | 16 | 0.98 | 0.05  | 0.03 | ---               |             |          |
| <u>RI-CLPM constrained</u> |                      |    |      |       |      |                   |             |          |
| RS ↔ DS                    | 67.27                | 24 | 0.97 | 0.05  | 0.06 | 10.10             | 8           | 0.26     |
| IA ↔ DS                    | 73.44                | 21 | 0.97 | 0.06  | 0.06 | 8.26              | 6           | 0.22     |
| PS ↔ DS                    | 62.10                | 24 | 0.98 | 0.05  | 0.05 | 5.19              | 8           | 0.73     |

*Notes.* RS = Relationship Satisfaction. IA = Ineffective Arguing. PS = Partner Support. DS = Depressive symptoms. W1 = Wave 1. W2 = Wave 2. W3 = Wave 3. W4 = Wave 4. <sup>a</sup>TRd = Test statistic distributed as chi-squared using scaling correction factor for MLR estimation. The RI-CLPM is the comparison model.

\**p* < .05. \*\**p* < .01.
